# Supplementary material
Source: publisher figshare collection journal article supplement (https://rs.figshare.com/ndownloader/files/8649727)
Supplement: Supplementary file 1 [file 8649727]

No_Spp	Sig_alph	Alpha	mu	sig_mu	Beta	Speed	Spp_No	Km	Initial Trait Val	Initial Pop Size	Burn In	Rep	Ext_Time	Notes
1	0.85	0	0.02	0.0015	0	0.0005	1	6267	-0.01578	2485	1	1	7200
1	0.85	0	0.02	0.0015	0	0.0005	1	6267	-0.0119	2572	2	1	7300
1	0.85	0	0.02	0.0015	0	0.0005	1	6267	-0.009067	2513	3	1	7700
1	0.85	0	0.02	0.0015	0	0.0005	1	6267	0.175	2489	4	1	7600
1	0.85	0	0.02	0.0015	0	0.0005	1	6267	-0.01033	2509	5	1	7600
2	0.85	0	0.02	0.0015	0	0.0005	1	11828	-0.3128	2421	1	1	800
2	0.85	0	0.02	0.0015	0	0.0005	1	11828	-0.294	2501	2	1	800
2	0.85	0	0.02	0.0015	0	0.0005	1	11828	-0.2944	2397	3	1	900
2	0.85	0	0.02	0.0015	0	0.0005	1	11828	-0.293	2450	4	1	800
2	0.85	0	0.02	0.0015	0	0.0005	1	11828	-0.2827	2491	5	1	800
2	0.85	0	0.02	0.0015	0	0.0005	2	11828	0.2919	2520	1	1	8700
2	0.85	0	0.02	0.0015	0	0.0005	2	11828	0.2963	2488	2	1	8700
2	0.85	0	0.02	0.0015	0	0.0005	2	11828	0.2985	2536	3	1	8900
2	0.85	0	0.02	0.0015	0	0.0005	2	11828	0.2899	2623	4	1	8600
2	0.85	0	0.02	0.0015	0	0.0005	2	11828	0.2913	2487	5	1	8900
1	0.85	0	0.02	0.0015	0	0.00005	1	6267	-0.01578	2485	1	1		No extinction by 15000 (ended here)
1	0.85	0	0.02	0.0015	0	0.00005	1	6267	-0.0119	2572	2	1		No extinction by 15000 (ended here)
1	0.85	0	0.02	0.0015	0	0.00005	1	6267	-0.009067	2513	3	1		No extinction by 15000 (ended here)
1	0.85	0	0.02	0.0015	0	0.00005	1	6267	0.175	2489	4	1		No extinction by 15000 (ended here)
1	0.85	0	0.02	0.0015	0	0.00005	1	6267	-0.01033	2509	5	1		No extinction by 15000 (ended here)
2	0.85	0	0.02	0.0015	0	0.00005	1	11828	-0.3128	2421	1	1	7900
2	0.85	0	0.02	0.0015	0	0.00005	1	11828	-0.294	2501	2	1	7700
2	0.85	0	0.02	0.0015	0	0.00005	1	11828	-0.2944	2397	3	1	7200
2	0.85	0	0.02	0.0015	0	0.00005	1	11828	-0.293	2450	4	1	9400
2	0.85	0	0.02	0.0015	0	0.00005	1	11828	-0.2827	2491	5	1	7200
2	0.85	0	0.02	0.0015	0	0.00005	2	11828	0.2919	2520	1	1		No extinction by 15000 (ended here)
2	0.85	0	0.02	0.0015	0	0.00005	2	11828	0.2963	2488	2	1		No extinction by 15000 (ended here)
2	0.85	0	0.02	0.0015	0	0.00005	2	11828	0.2985	2536	3	1		No extinction by 15000 (ended here)
2	0.85	0	0.02	0.0015	0	0.00005	2	11828	0.2899	2623	4	1		No extinction by 15000 (ended here)
2	0.85	0	0.02	0.0015	0	0.00005	2	11828	0.2913	2487	5	1		No extinction by 15000 (ended here)
1	0.85	4	0.02	0.0015	0	0.0005	1	5669	-0.5376	2561	1	1	4100
1	0.85	4	0.02	0.0015	0	0.0005	1	5669	-0.5391	2563	2	1	4200
1	0.85	4	0.02	0.0015	0	0.0005	1	5669	-0.5583	2535	3	1	4200
1	0.85	4	0.02	0.0015	0	0.0005	1	5669	-0.5542	2498	4	1	3900
1	0.85	4	0.02	0.0015	0	0.0005	1	5669	-0.5783	2576	5	1	4100
2	0.85	4	0.02	0.0015	0	0.0005	1	10756	-0.6071	4336	1	1	1400
2	0.85	4	0.02	0.0015	0	0.0005	1	10756	-0.6076	4324	2	1	1300
2	0.85	4	0.02	0.0015	0	0.0005	1	10756	-0.6021	4442	3	1	1400
2	0.85	4	0.02	0.0015	0	0.0005	1	10756	-0.6073	4398	4	1	1400
2	0.85	4	0.02	0.0015	0	0.0005	1	10756	-0.6028	4330	5	1	1400
2	0.85	4	0.02	0.0015	0	0.0005	2	10756	0.4078	625	1	1	6500
2	0.85	4	0.02	0.0015	0	0.0005	2	10756	0.3869	664	2	1	6400
2	0.85	4	0.02	0.0015	0	0.0005	2	10756	0.4418	509	3	1	6400
2	0.85	4	0.02	0.0015	0	0.0005	2	10756	0.4319	675	4	1	6500
2	0.85	4	0.02	0.0015	0	0.0005	2	10756	0.4215	583	5	1	6600
1	0.85	4	0.02	0.0015	0	0.00005	1	5669	-0.5376	2561	1	1		No extinction by 15000 (ended here)
1	0.85	4	0.02	0.0015	0	0.00005	1	5669	-0.5391	2563	2	1		No extinction by 15000 (ended here)
1	0.85	4	0.02	0.0015	0	0.00005	1	5669	-0.5583	2535	3	1		No extinction by 15000 (ended here)
1	0.85	4	0.02	0.0015	0	0.00005	1	5669	-0.5542	2498	4	1		No extinction by 15000 (ended here)
1	0.85	4	0.02	0.0015	0	0.00005	1	5669	-0.5783	2576	5	1		No extinction by 15000 (ended here)
2	0.85	4	0.02	0.0015	0	0.00005	1	10756	-0.6071	4336	1	1	16000
2	0.85	4	0.02	0.0015	0	0.00005	1	10756	-0.6076	4324	2	1	14200
2	0.85	4	0.02	0.0015	0	0.00005	1	10756	-0.6021	4442	3	1	15000
2	0.85	4	0.02	0.0015	0	0.00005	1	10756	-0.6073	4398	4	1	15900
2	0.85	4	0.02	0.0015	0	0.00005	1	10756	-0.6028	4330	5	1	15400
2	0.85	4	0.02	0.0015	0	0.00005	2	10756	0.4078	625	1	1		No extinction by 30000 (ended here)
2	0.85	4	0.02	0.0015	0	0.00005	2	10756	0.3869	664	2	1		No extinction by 30000 (ended here)
2	0.85	4	0.02	0.0015	0	0.00005	2	10756	0.4418	509	3	1		No extinction by 30000 (ended here)
2	0.85	4	0.02	0.0015	0	0.00005	2	10756	0.4319	675	4	1		No extinction by 30000 (ended here)
2	0.85	4	0.02	0.0015	0	0.00005	2	10756	0.4215	583	5	1		No extinction by 30000 (ended here)
1	0.85	-4	0.02	0.0015	0	0.0005	1	5669	0.5376	2561	1	1	10200
1	0.85	-4	0.02	0.0015	0	0.0005	1	5669	0.5391	2563	2	1	9900
1	0.85	-4	0.02	0.0015	0	0.0005	1	5669	0.5583	2535	3	1	10100
1	0.85	-4	0.02	0.0015	0	0.0005	1	5669	0.5542	2498	4	1	10400
1	0.85	-4	0.02	0.0015	0	0.0005	1	5669	0.5783	2576	5	1	10400
2	0.85	-4	0.02	0.0015	0	0.0005	1	10756	0.6071	4336	1	1	11000
2	0.85	-4	0.02	0.0015	0	0.0005	1	10756	0.6076	4324	2	1	11200
2	0.85	-4	0.02	0.0015	0	0.0005	1	10756	0.6021	4442	3	1	11200
2	0.85	-4	0.02	0.0015	0	0.0005	1	10756	0.6073	4398	4	1	11100
2	0.85	-4	0.02	0.0015	0	0.0005	1	10756	0.6028	4330	5	1	11000
2	0.85	-4	0.02	0.0015	0	0.0005	2	10756	-0.4078	625	1	1	500
2	0.85	-4	0.02	0.0015	0	0.0005	2	10756	-0.3869	664	2	1	500
2	0.85	-4	0.02	0.0015	0	0.0005	2	10756	-0.4418	509	3	1	500
2	0.85	-4	0.02	0.0015	0	0.0005	2	10756	-0.4319	675	4	1	600
2	0.85	-4	0.02	0.0015	0	0.0005	2	10756	-0.4215	583	5	1	500
1	0.85	-4	0.02	0.0015	0	0.00005	1	5669	0.5376	2561	1	1		No extinction by 15000 (ended here)
1	0.85	-4	0.02	0.0015	0	0.00005	1	5669	0.5391	2563	2	1		No extinction by 15000 (ended here)
1	0.85	-4	0.02	0.0015	0	0.00005	1	5669	0.5583	2535	3	1		No extinction by 15000 (ended here)
1	0.85	-4	0.02	0.0015	0	0.00005	1	5669	0.5542	2498	4	1		No extinction by 15000 (ended here)
1	0.85	-4	0.02	0.0015	0	0.00005	1	5669	0.5783	2576	5	1		No extinction by 15000 (ended here)
2	0.85	-4	0.02	0.0015	0	0.00005	1	10756	0.6071	4336	1	1		No extinction by 15000 (ended here)
2	0.85	-4	0.02	0.0015	0	0.00005	1	10756	0.6076	4324	2	1		No extinction by 15000 (ended here)
2	0.85	-4	0.02	0.0015	0	0.00005	1	10756	0.6021	4442	3	1		No extinction by 15000 (ended here)
2	0.85	-4	0.02	0.0015	0	0.00005	1	10756	0.6073	4398	4	1		No extinction by 15000 (ended here)
2	0.85	-4	0.02	0.0015	0	0.00005	1	10756	0.6028	4330	5	1		No extinction by 15000 (ended here)
2	0.85	-4	0.02	0.0015	0	0.00005	2	10756	-0.4078	625	1	1	6900
2	0.85	-4	0.02	0.0015	0	0.00005	2	10756	-0.3869	664	2	1	8000
2	0.85	-4	0.02	0.0015	0	0.00005	2	10756	-0.4418	509	3	1	7100
2	0.85	-4	0.02	0.0015	0	0.00005	2	10756	-0.4319	675	4	1	9100
2	0.85	-4	0.02	0.0015	0	0.00005	2	10756	-0.4215	583	5	1	7400
2	0.85	4	0.2	0.0015	0	0.0005	1	10756	-0.6088	4490	1	1	1700
2	0.85	4	0.2	0.0015	0	0.0005	1	10756	-0.6004	4374	2	1	1700		1620	48.98979486
2	0.85	4	0.2	0.0015	0	0.0005	1	10756	-0.6198	4249	3	1	1500
2	0.85	4	0.2	0.0015	0	0.0005	1	10756	-0.5958	4450	4	1	1500
2	0.85	4	0.2	0.0015	0	0.0005	1	10756	-0.6037	4379	5	1	1700
2	0.85	4	0.2	0.0015	0	0.0005	2	10756	0.4619	644	1	1		No extinction by 15000 (ended here)
2	0.85	4	0.2	0.0015	0	0.0005	2	10756	0.4103	645	2	1		No extinction by 15000 (ended here)
2	0.85	4	0.2	0.0015	0	0.0005	2	10756	0.3608	601	3	1		No extinction by 15000 (ended here)
2	0.85	4	0.2	0.0015	0	0.0005	2	10756	0.3524	626	4	1		No extinction by 15000 (ended here)
2	0.85	4	0.2	0.0015	0	0.0005	2	10756	0.4204	671	5	1		No extinction by 15000 (ended here)
2	0.85	4	0.2	0.0015	0	0.00005	1	10756	-0.6088	4490	1	1		No extinction by 15000 (ended here), original
2	0.85	4	0.2	0.0015	0	0.00005	1	10756	-0.6088	4490	1	2		No extinction by 28400 (ended here)
2	0.85	4	0.2	0.0015	0	0.00005	1	10756	-0.6004	4374	2	1		No extinction by 15000 (ended here), original
2	0.85	4	0.2	0.0015	0	0.00005	1	10756	-0.6004	4374	2	2	43800			41625	1556.224063
2	0.85	4	0.2	0.0015	0	0.00005	1	10756	-0.6198	4249	3	1		No extinction by 15000 (ended here), original
2	0.85	4	0.2	0.0015	0	0.00005	1	10756	-0.6198	4249	3	2	42400
2	0.85	4	0.2	0.0015	0	0.00005	1	10756	-0.5958	4450	4	1		No extinction by 15000 (ended here), original
2	0.85	4	0.2	0.0015	0	0.00005	1	10756	-0.5958	4450	4	2	43800
2	0.85	4	0.2	0.0015	0	0.00005	1	10756	-0.6037	4379	5	1		No extinction by 15000 (ended here), original
2	0.85	4	0.2	0.0015	0	0.00005	1	10756	-0.6037	4379	5	2	36500
2	0.85	4	0.2	0.0015	0	0.00005	2	10756	0.4619	644	1	1		No extinction by 15000 (ended here), original
2	0.85	4	0.2	0.0015	0	0.00005	2	10756	0.4619	644	1	2	28400
2	0.85	4	0.2	0.0015	0	0.00005	2	10756	0.4103	645	2	1		No extinction by 15000 (ended here), original
2	0.85	4	0.2	0.0015	0	0.00005	2	10756	0.4103	645	2	2		No extinction by 43800 (ended here)
2	0.85	4	0.2	0.0015	0	0.00005	2	10756	0.3608	601	3	1		No extinction by 15000 (ended here), original
2	0.85	4	0.2	0.0015	0	0.00005	2	10756	0.3608	601	3	2		No extinction by 42400 (ended here)
2	0.85	4	0.2	0.0015	0	0.00005	2	10756	0.3524	626	4	1		No extinction by 15000 (ended here), original
2	0.85	4	0.2	0.0015	0	0.00005	2	10756	0.3524	626	4	2		No extinction by 43800 (ended here)
2	0.85	4	0.2	0.0015	0	0.00005	2	10756	0.4204	671	5	1		No extinction by 15000 (ended here), original
2	0.85	4	0.2	0.0015	0	0.00005	2	10756	0.4204	671	5	2		No extinction by 36500 (ended here)
2	0.85	4	0.2	0.0015	0	0.00025	1	10756	-0.6088	4490	1	1	3700
2	0.85	4	0.2	0.0015	0	0.00025	2	10756	0.4619	644	1	1		No extinction by 3700 (ended here)
2	0.85	4	0.2	0.0015	0	0.0002	1	10756	-0.6088	4490	1	1	4700
2	0.85	4	0.2	0.0015	0	0.0002	2	10756	0.4619	644	1	1		No extinction by 4700 (ended here)
2	0.85	4	0.2	0.0015	0	0.00015	1	10756	-0.6088	4490	1	1	6400
2	0.85	4	0.2	0.0015	0	0.00015	1	10756	-0.6088	4490	1	2	6000
2	0.85	4	0.2	0.0015	0	0.00015	1	10756	-0.6004	4374	2	1	6300
2	0.85	4	0.2	0.0015	0	0.00015	1	10756	-0.6004	4374	2	2	6500
2	0.85	4	0.2	0.0015	0	0.00015	1	10756	-0.6198	4249	3	1	6900		6490	139.4034911
2	0.85	4	0.2	0.0015	0	0.00015	1	10756	-0.6198	4249	3	2	7300
2	0.85	4	0.2	0.0015	0	0.00015	1	10756	-0.5958	4450	4	1	6800
2	0.85	4	0.2	0.0015	0	0.00015	1	10756	-0.5958	4450	4	2	6700
2	0.85	4	0.2	0.0015	0	0.00015	1	10756	-0.6037	4379	5	1	6100
2	0.85	4	0.2	0.0015	0	0.00015	1	10756	-0.6037	4379	5	2	5900
2	0.85	4	0.2	0.0015	0	0.00015	2	10756	0.4619	644	1	1		No extinction by 6400 (ended here)
2	0.85	4	0.2	0.0015	0	0.00015	2	10756	0.4619	644	1	2		No extinction by 6000 (ended here)
2	0.85	4	0.2	0.0015	0	0.00015	2	10756	0.4619	645	2	1		No extinction by 6300 (ended here)
2	0.85	4	0.2	0.0015	0	0.00015	2	10756	0.4619	645	2	2		No extinction by 6500 (ended here)
2	0.85	4	0.2	0.0015	0	0.00015	2	10756	0.4619	601	3	1		No extinction by 6900 (ended here)
2	0.85	4	0.2	0.0015	0	0.00015	2	10756	0.4619	601	3	2		No extinction by 7300 (ended here)
2	0.85	4	0.2	0.0015	0	0.00015	2	10756	0.4619	626	4	1		No extinction by 6800 (ended here)
2	0.85	4	0.2	0.0015	0	0.00015	2	10756	0.4619	626	4	2		No extinction by 6700 (ended here)
2	0.85	4	0.2	0.0015	0	0.00015	2	10756	0.4619	671	5	1		No extinction by 6100 (ended here)
2	0.85	4	0.2	0.0015	0	0.00015	2	10756	0.4619	671	5	2		No extinction by 5900 (ended here)
2	0.85	4	0.2	0.0015	0	0.0001	1	10756	-0.6088	4490	1	1	10800
2	0.85	4	0.2	0.0015	0	0.0001	1	10756	-0.6088	4490	1	2	10100
2	0.85	4	0.2	0.0015	0	0.0001	1	10756	-0.6004	4374	2	1	13400
2	0.85	4	0.2	0.0015	0	0.0001	1	10756	-0.6004	4374	2	2	11300
2	0.85	4	0.2	0.0015	0	0.0001	1	10756	-0.6198	4249	3	1	11400		11980	445.670531
2	0.85	4	0.2	0.0015	0	0.0001	1	10756	-0.6198	4249	3	2	12400
2	0.85	4	0.2	0.0015	0	0.0001	1	10756	-0.5958	4450	4	1	12200
2	0.85	4	0.2	0.0015	0	0.0001	1	10756	-0.5958	4450	4	2	12100
2	0.85	4	0.2	0.0015	0	0.0001	1	10756	-0.6037	4379	5	1	15000
2	0.85	4	0.2	0.0015	0	0.0001	1	10756	-0.6037	4379	5	2	11100
2	0.85	4	0.2	0.0015	0	0.0001	2	10756	0.4619	644	1	1		No extinction by 10800 (ended here)
2	0.85	4	0.2	0.0015	0	0.0001	2	10756	0.4619	644	1	2		No extinction by 10100 (ended here)
2	0.85	4	0.2	0.0015	0	0.0001	2	10756	0.4619	645	2	1		No extinction by 13400 (ended here)
2	0.85	4	0.2	0.0015	0	0.0001	2	10756	0.4619	645	2	2		No extinction by 11300 (ended here)
2	0.85	4	0.2	0.0015	0	0.0001	2	10756	0.4619	601	3	1		No extinction by 11400 (ended here)
2	0.85	4	0.2	0.0015	0	0.0001	2	10756	0.4619	601	3	2		No extinction by 12400 (ended here)
2	0.85	4	0.2	0.0015	0	0.0001	2	10756	0.4619	626	4	1		No extinction by 12200 (ended here)
2	0.85	4	0.2	0.0015	0	0.0001	2	10756	0.4619	626	4	2		No extinction by 12100 (ended here)
2	0.85	4	0.2	0.0015	0	0.0001	2	10756	0.4619	671	5	1		No extinction by 15000 (ended here)
2	0.85	4	0.2	0.0015	0	0.0001	2	10756	0.4619	671	5	2		No extinction by 11100 (ended here)
2	0.85	-4	0.2	0.0015	0	0.0005	1	10756	-0.6088	4490	1	1		No extinction by 15000 (ended here)
2	0.85	-4	0.2	0.0015	0	0.0005	1	10756	-0.6004	4374	2	1		No extinction by 15000 (ended here)
2	0.85	-4	0.2	0.0015	0	0.0005	1	10756	-0.6198	4249	3	1		No extinction by 15000 (ended here)
2	0.85	-4	0.2	0.0015	0	0.0005	1	10756	-0.5958	4450	4	1		No extinction by 15000 (ended here)
2	0.85	-4	0.2	0.0015	0	0.0005	1	10756	-0.6037	4379	5	1		No extinction by 15000 (ended here)
2	0.85	-4	0.2	0.0015	0	0.0005	2	10756	0.4619	644	1	1	900
2	0.85	-4	0.2	0.0015	0	0.0005	2	10756	0.4103	645	2	1	1100
2	0.85	-4	0.2	0.0015	0	0.0005	2	10756	0.3608	601	3	1	600
2	0.85	-4	0.2	0.0015	0	0.0005	2	10756	0.3524	626	4	1	1000
2	0.85	-4	0.2	0.0015	0	0.0005	2	10756	0.4204	671	5	1	1000
2	0.85	-4	0.2	0.0015	0	0.00005	1	10756	-0.6088	4490	1	1		No extinction by 15000 (ended here)
2	0.85	-4	0.2	0.0015	0	0.00005	1	10756	-0.6004	4374	2	1		No extinction by 15000 (ended here)
2	0.85	-4	0.2	0.0015	0	0.00005	1	10756	-0.6198	4249	3	1		No extinction by 15000 (ended here)
2	0.85	-4	0.2	0.0015	0	0.00005	1	10756	-0.5958	4450	4	1		No extinction by 15000 (ended here)
2	0.85	-4	0.2	0.0015	0	0.00005	1	10756	-0.6037	4379	5	1		No extinction by 15000 (ended here)
2	0.85	-4	0.2	0.0015	0	0.00005	2	10756	0.4619	644	1	1		No extinction by 15000 (ended here)
2	0.85	-4	0.2	0.0015	0	0.00005	2	10756	0.4103	645	2	1		No extinction by 15000 (ended here)
2	0.85	-4	0.2	0.0015	0	0.00005	2	10756	0.3608	601	3	1		No extinction by 15000 (ended here)
2	0.85	-4	0.2	0.0015	0	0.00005	2	10756	0.3524	626	4	1		No extinction by 15000 (ended here)
2	0.85	-4	0.2	0.0015	0	0.00005	2	10756	0.4204	671	5	1		No extinction by 15000 (ended here)
2	0.85	4	0.02	0.015	0	0.0005	1	10756	-0.6001	4486	1	1	3500	original	3535.294118	184.4987599
2	0.85	4	0.02	0.015	0	0.0005	1	10756	-0.6001	4486	1	2		No extinction by 5200 (ended there)
2	0.85	4	0.02	0.015	0	0.0005	1	10756	-0.6001	4486	1	3	2700
2	0.85	4	0.02	0.015	0	0.0005	1	10756	-0.6001	4486	1	4	2800
2	0.85	4	0.02	0.015	0	0.0005	1	10756	-0.5696	4554	2	1	3100	original
2	0.85	4	0.02	0.015	0	0.0005	1	10756	-0.5696	4554	2	2	2800
2	0.85	4	0.02	0.015	0	0.0005	1	10756	-0.5696	4554	2	3	4800
2	0.85	4	0.02	0.015	0	0.0005	1	10756	-0.5696	4554	2	4		No extinction by 5400 (ended there)
2	0.85	4	0.02	0.015	0	0.0005	1	10756	-0.594	4461	3	1	4500	original
2	0.85	4	0.02	0.015	0	0.0005	1	10756	-0.594	4461	3	2	3500
2	0.85	4	0.02	0.015	0	0.0005	1	10756	-0.594	4461	3	3	5300
2	0.85	4	0.02	0.015	0	0.0005	1	10756	-0.594	4461	3	4	4000
2	0.85	4	0.02	0.015	0	0.0005	1	10756	-0.5796	4464	4	1		No extinction by 15000 (ended here), original
2	0.85	4	0.02	0.015	0	0.0005	1	10756	-0.5796	4464	4	2	3000
2	0.85	4	0.02	0.015	0	0.0005	1	10756	-0.5796	4464	4	3	4000
2	0.85	4	0.02	0.015	0	0.0005	1	10756	-0.5796	4464	4	4	2700
2	0.85	4	0.02	0.015	0	0.0005	1	10756	-0.5661	4405	5	1	3300	original
2	0.85	4	0.02	0.015	0	0.0005	1	10756	-0.5661	4405	5	2	3600
2	0.85	4	0.02	0.015	0	0.0005	1	10756	-0.5661	4405	5	3	3300
2	0.85	4	0.02	0.015	0	0.0005	1	10756	-0.5661	4405	5	4	3200
2	0.85	4	0.02	0.015	0	0.0005	2	10756	0.4136	601	1	1		No extinction by 15000 (ended here), original
2	0.85	4	0.02	0.015	0	0.0005	2	10756	0.4136	601	1	2	5200			4966.666667	338.2963855
2	0.85	4	0.02	0.015	0	0.0005	2	10756	0.4136	601	1	3		No extinction by 2700 (ended there)
2	0.85	4	0.02	0.015	0	0.0005	2	10756	0.4136	601	1	4		No extinction by 2800 (ended there)
2	0.85	4	0.02	0.015	0	0.0005	2	10756	0.5456	537	2	1		No extinction by 15000 (ended here), original
2	0.85	4	0.02	0.015	0	0.0005	2	10756	0.5456	537	2	2		No extinction by 2800 (ended there)
2	0.85	4	0.02	0.015	0	0.0005	2	10756	0.5456	537	2	3		No extinction by 4800 (ended there)
2	0.85	4	0.02	0.015	0	0.0005	2	10756	0.5456	537	2	4	5400
2	0.85	4	0.02	0.015	0	0.0005	2	10756	0.4782	474	3	1		No extinction by 15000 (ended here), original
2	0.85	4	0.02	0.015	0	0.0005	2	10756	0.4782	474	3	2		No extinction by 3500 (ended there)
2	0.85	4	0.02	0.015	0	0.0005	2	10756	0.4782	474	3	3		No extinction by 5300 (ended there)
2	0.85	4	0.02	0.015	0	0.0005	2	10756	0.4782	474	3	4		No extinction by 4000 (ended there)
2	0.85	4	0.02	0.015	0	0.0005	2	10756	0.4219	557	4	1	4300	original
2	0.85	4	0.02	0.015	0	0.0005	2	10756	0.4219	557	4	2		No extinction by 3000 (ended there)
2	0.85	4	0.02	0.015	0	0.0005	2	10756	0.4219	557	4	3		No extinction by 4000 (ended there)
2	0.85	4	0.02	0.015	0	0.0005	2	10756	0.4219	557	4	4		No extinction by 2700 (ended there)
2	0.85	4	0.02	0.015	0	0.0005	2	10756	0.4509	506	5	1		No extinction by 15000 (ended here), original
2	0.85	4	0.02	0.015	0	0.0005	2	10756	0.4509	506	5	2		No extinction by 3600 (ended there)
2	0.85	4	0.02	0.015	0	0.0005	2	10756	0.4509	506	5	3		No extinction by 3300 (ended there)
2	0.85	4	0.02	0.015	0	0.0005	2	10756	0.4509	506	5	4		No extinction by 3200 (ended there)
2	0.85	4	0.02	0.015	0	0.00005	1	10756	-0.6001	4486	1			No extinction by 15000 (ended here)
2	0.85	4	0.02	0.015	0	0.00005	1	10756	-0.5696	4554	2			No extinction by 15000 (ended here)
2	0.85	4	0.02	0.015	0	0.00005	1	10756	-0.6001	4486	3			No extinction by 15000 (ended here)
2	0.85	4	0.02	0.015	0	0.00005	1	10756	-0.5696	4554	4			No extinction by 15000 (ended here)
2	0.85	4	0.02	0.015	0	0.00005	1	10756	-0.5696	4554	5			No extinction by 15000 (ended here)
2	0.85	4	0.02	0.015	0	0.00005	2	10756	0.4136	601	1			No extinction by 15000 (ended here)
2	0.85	4	0.02	0.015	0	0.00005	2	10756	0.5456	537	2			No extinction by 15000 (ended here)
2	0.85	4	0.02	0.015	0	0.00005	2	10756	0.4136	601	3			No extinction by 15000 (ended here)
2	0.85	4	0.02	0.015	0	0.00005	2	10756	0.5456	537	4			No extinction by 15000 (ended here)
2	0.85	4	0.02	0.015	0	0.00005	2	10756	0.5456	537	5			No extinction by 15000 (ended here)
2	0.85	-4	0.02	0.015	0	0.0005	1	10756	-0.6001	4486	1		3200
2	0.85	-4	0.02	0.015	0	0.0005	1	10756	-0.5696	4554	2		4300
2	0.85	-4	0.02	0.015	0	0.0005	1	10756	-0.594	4461	3		2400
2	0.85	-4	0.02	0.015	0	0.0005	1	10756	-0.5796	4464	4		3500
2	0.85	-4	0.02	0.015	0	0.0005	1	10756	-0.5661	4405	5		2600
2	0.85	-4	0.02	0.015	0	0.0005	2	10756	0.4136	601	1			No extinction by 15000 (ended here)
2	0.85	-4	0.02	0.015	0	0.0005	2	10756	0.5456	537	2			No extinction by 15000 (ended here)
2	0.85	-4	0.02	0.015	0	0.0005	2	10756	0.4782	474	3			No extinction by 15000 (ended here)
2	0.85	-4	0.02	0.015	0	0.0005	2	10756	0.4219	557	4			No extinction by 15000 (ended here)
2	0.85	-4	0.02	0.015	0	0.0005	2	10756	0.4509	506	5			No extinction by 15000 (ended here)
2	0.85	-4	0.02	0.015	0	0.00005	1	10756	-0.6001	4486	1			No extinction by 15000 (ended here)
2	0.85	-4	0.02	0.015	0	0.00005	1	10756	-0.5696	4554	2			No extinction by 15000 (ended here)
2	0.85	-4	0.02	0.015	0	0.00005	1	10756	-0.594	4461	3			No extinction by 15000 (ended here)
2	0.85	-4	0.02	0.015	0	0.00005	1	10756	-0.5796	4464	4			No extinction by 15000 (ended here)
2	0.85	-4	0.02	0.015	0	0.00005	1	10756	-0.5661	4405	5			No extinction by 15000 (ended here)
2	0.85	-4	0.02	0.015	0	0.00005	2	10756	0.4136	601	1			No extinction by 15000 (ended here)
2	0.85	-4	0.02	0.015	0	0.00005	2	10756	0.5456	537	2			No extinction by 15000 (ended here)
2	0.85	-4	0.02	0.015	0	0.00005	2	10756	0.4782	474	3			No extinction by 15000 (ended here)
2	0.85	-4	0.02	0.015	0	0.00005	2	10756	0.4219	557	4			No extinction by 15000 (ended here)
2	0.85	-4	0.02	0.015	0	0.00005	2	10756	0.4509	506	5			No extinction by 15000 (ended here)
1	0.85	0	0.02	0.0015	0.6	0.0005	1	7816	0.6599	2498	1		9500
1	0.85	0	0.02	0.0015	0.6	0.0005	1	7816	0.6658	2535	2		9200
1	0.85	0	0.02	0.0015	0.6	0.0005	1	7816	0.6648	2485	3		9500
1	0.85	0	0.02	0.0015	0.6	0.0005	1	7816	0.6609	2569	4		9400
1	0.85	0	0.02	0.0015	0.6	0.0005	1	7816	0.6818	2455	5		9600
2	0.85	0	0.02	0.0015	0.6	0.0005	1	14492	-0.4543	995	1		200
2	0.85	0	0.02	0.0015	0.6	0.0005	1	14492	-0.457	993	2		200
2	0.85	0	0.02	0.0015	0.6	0.0005	1	14492	-0.4527	740	3		100
2	0.85	0	0.02	0.0015	0.6	0.0005	1	14492	-0.4664	696	4		100
2	0.85	0	0.02	0.0015	0.6	0.0005	1	14492	-0.4401	870	5		200
2	0.85	0	0.02	0.0015	0.6	0.0005	2	14492	0.6802	5385	1		10500
2	0.85	0	0.02	0.0015	0.6	0.0005	2	14492	0.6778	5282	2		10400
2	0.85	0	0.02	0.0015	0.6	0.0005	2	14492	0.6645	5494	3		10200
2	0.85	0	0.02	0.0015	0.6	0.0005	2	14492	0.6622	5514	4		10100
2	0.85	0	0.02	0.0015	0.6	0.0005	2	14492	0.67	5386	5		10100
1	0.85	0	0.02	0.0015	0.6	0.00005	1	7816	0.6599	2498	1			No extinction by 15000 (ended here)
1	0.85	0	0.02	0.0015	0.6	0.00005	1	7816	0.6658	2535	2			No extinction by 15000 (ended here)
1	0.85	0	0.02	0.0015	0.6	0.00005	1	7816	0.6648	2485	3			No extinction by 15000 (ended here)
1	0.85	0	0.02	0.0015	0.6	0.00005	1	7816	0.6609	2569	4			No extinction by 15000 (ended here)
1	0.85	0	0.02	0.0015	0.6	0.00005	1	7816	0.6818	2455	5			No extinction by 15000 (ended here)
2	0.85	0	0.02	0.0015	0.6	0.00005	1	14492	-0.4543	995	1		1700
2	0.85	0	0.02	0.0015	0.6	0.00005	1	14492	-0.457	993	2		1600
2	0.85	0	0.02	0.0015	0.6	0.00005	1	14492	-0.4527	740	3		1500
2	0.85	0	0.02	0.0015	0.6	0.00005	1	14492	-0.4664	696	4		1600
2	0.85	0	0.02	0.0015	0.6	0.00005	1	14492	-0.4401	870	5		1800
2	0.85	0	0.02	0.0015	0.6	0.00005	2	14492	0.6802	5385	1			No extinction by 15000 (ended here)
2	0.85	0	0.02	0.0015	0.6	0.00005	2	14492	0.6778	5282	2			No extinction by 15000 (ended here)
2	0.85	0	0.02	0.0015	0.6	0.00005	2	14492	0.6645	5494	3			No extinction by 15000 (ended here)
2	0.85	0	0.02	0.0015	0.6	0.00005	2	14492	0.6622	5514	4			No extinction by 15000 (ended here)
2	0.85	0	0.02	0.0015	0.6	0.00005	2	14492	0.67	5386	5			No extinction by 15000 (ended here)
1	0.85	0	0.02	0.0015	-0.6	0.0005	1	7816	-0.6599	2498	1		6100
1	0.85	0	0.02	0.0015	-0.6	0.0005	1	7816	-0.6658	2535	2		6100
1	0.85	0	0.02	0.0015	-0.6	0.0005	1	7816	-0.6648	2485	3		5900
1	0.85	0	0.02	0.0015	-0.6	0.0005	1	7816	-0.6609	2569	4		5900
1	0.85	0	0.02	0.0015	-0.6	0.0005	1	7816	-0.6818	2455	5		6300
2	0.85	0	0.02	0.0015	-0.6	0.0005	1	14492	0.4543	995	1		8600
2	0.85	0	0.02	0.0015	-0.6	0.0005	1	14492	0.457	993	2		8800
2	0.85	0	0.02	0.0015	-0.6	0.0005	1	14492	0.4527	740	3		8600
2	0.85	0	0.02	0.0015	-0.6	0.0005	1	14492	0.4664	696	4		8600
2	0.85	0	0.02	0.0015	-0.6	0.0005	1	14492	0.4401	870	5		8700
2	0.85	0	0.02	0.0015	-0.6	0.0005	2	14492	-0.6802	5385	1		1400
2	0.85	0	0.02	0.0015	-0.6	0.0005	2	14492	-0.6778	5282	2		1400
2	0.85	0	0.02	0.0015	-0.6	0.0005	2	14492	-0.6645	5494	3		1400
2	0.85	0	0.02	0.0015	-0.6	0.0005	2	14492	-0.6622	5514	4		1400
2	0.85	0	0.02	0.0015	-0.6	0.0005	2	14492	-0.67	5386	5		1400
1	0.85	0	0.02	0.0015	-0.6	0.00005	1	7816	-0.6599	2498	1			No extinction by 15000 (ended here)
1	0.85	0	0.02	0.0015	-0.6	0.00005	1	7816	-0.6658	2535	2			No extinction by 15000 (ended here)
1	0.85	0	0.02	0.0015	-0.6	0.00005	1	7816	-0.6648	2485	3			No extinction by 15000 (ended here)
1	0.85	0	0.02	0.0015	-0.6	0.00005	1	7816	-0.6609	2569	4			No extinction by 15000 (ended here)
1	0.85	0	0.02	0.0015	-0.6	0.00005	1	7816	-0.6818	2455	5			No extinction by 15000 (ended here)
2	0.85	0	0.02	0.0015	-0.6	0.00005	1	14492	0.4543	995	1			No extinction by 15000 (ended here)
2	0.85	0	0.02	0.0015	-0.6	0.00005	1	14492	0.457	993	2			No extinction by 15000 (ended here)
2	0.85	0	0.02	0.0015	-0.6	0.00005	1	14492	0.4527	740	3			No extinction by 15000 (ended here)
2	0.85	0	0.02	0.0015	-0.6	0.00005	1	14492	0.4664	696	4			No extinction by 15000 (ended here)
2	0.85	0	0.02	0.0015	-0.6	0.00005	1	14492	0.4401	870	5			No extinction by 15000 (ended here)
2	0.85	0	0.02	0.0015	-0.6	0.00005	2	14492	-0.6802	5385	1		13700
2	0.85	0	0.02	0.0015	-0.6	0.00005	2	14492	-0.6778	5282	2		12600
2	0.85	0	0.02	0.0015	-0.6	0.00005	2	14492	-0.6645	5494	3		14300
2	0.85	0	0.02	0.0015	-0.6	0.00005	2	14492	-0.6622	5514	4		14000
2	0.85	0	0.02	0.0015	-0.6	0.00005	2	14492	-0.67	5386	5		13500
